# Supplementary material
Source: Springer Nature journal article supplement (https://www.springermedizin.de/resource/supplementary/12883_2011_554_MOESM1_ESM.pdf/9455396)
Supplement: MOESM1 [file 9455396]

# (HISTO)PATHOLOGY

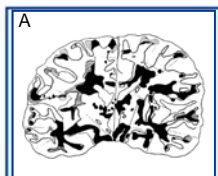

GM pathology more frequently detected

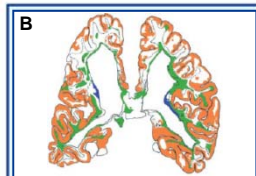

GM pathology is common and widespread

Pathological correlates:  
GM  $\neq$  WM

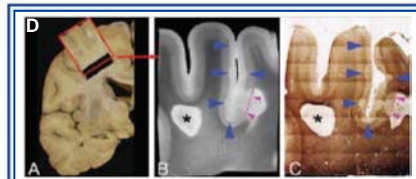

Histopathology – high field MRI verification

Underlying correlate of MRI visible vs. invisible lesions

1<sup>st</sup> detection of MS lesions in (sub)-cortical gray matter

← 1962

*Nineties*

2000 ----- 2005

2006 ----- 2011 →

GM lesions hard to visualize with MRI

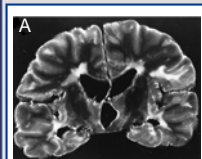

Quantitative MRI able to detect changes in (NA)GM

GM atrophy, thalamic atrophy

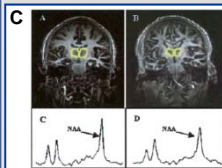

DIR – scoring recommendations for cortical lesions

(Ultra) High-field MRI

Interest in specific GM structures

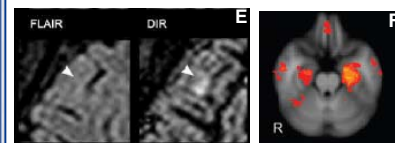

# NEUROIMAGING
